Online Supplemental Material

**Table S1.** Significance levels (2-tailed *P* values; degrees of freedom in parentheses) from SAS Procedure Mixed Analyses of seven body mass measurements at different infection time points.

| Trait (N)                                                          | Transform | Mean Age (days) | Infection                  | Linetype            | Infection*Linetype | Mini-muscle                 | Age                         | Diaphragm Larvae Counts         |
|--------------------------------------------------------------------|-----------|-----------------|----------------------------|---------------------|--------------------|-----------------------------|-----------------------------|---------------------------------|
| Bleed 1 Mass (at infection) (101)                                  | None      | 51              | --                         | 0.1004 (-)<br>(1,6) | --                 | <b>0.0027 (-)</b><br>(1,91) | <b>0.0168 (+)</b><br>(1,91) | --                              |
| Bleed 2 Mass (100)                                                 | None      | 58              | 0.0969 (-)<br>(1,6)        | 0.2069 (-)<br>(1,6) | 0.3671<br>(1,6)    | <b>0.0097 (-)</b><br>(1,82) | <b>0.0224 (+)</b><br>(1,82) | --                              |
| Bleed 3 Mass (97)                                                  | None      | 65              | <b>0.0055 (-)</b><br>(1,6) | 0.2322 (-)<br>(1,6) | 0.1716<br>(1,6)    | <b>0.0097 (-)</b><br>(1,79) | 0.0881 (+)<br>(1,79)        | --                              |
| Mass On Wheel (96)                                                 | None      | 82              | <b>0.0303 (-)</b><br>(1,6) | 0.1646 (-)<br>(1,6) | 0.6088<br>(1,6)    | <b>0.0012 (-)</b><br>(1,79) | 0.7893 (+)<br>(1,79)        | --                              |
| Mass On Wheel (with Diaphragm Larvae Count) (49)                   | None      | 82              | --                         | 0.1790 (-)<br>(1,6) | --                 | <b>0.0037 (-)</b><br>(1,38) | 0.5197 (+)<br>(1,38)        | <b>&lt;0.0001 (-)</b><br>(1,38) |
| $\dot{V}O_2$ max (1) (Mass Off) (95)                               | None      | 88              | <b>0.0180 (-)</b><br>(1,6) | 0.2052 (-)<br>(1,6) | 0.6001<br>(1,6)    | <b>0.0013 (-)</b><br>(1,77) | 0.7414 (+)<br>(1,79)        | --                              |
| $\dot{V}O_2$ max (1) (Mass Off) (with Diaphragm Larvae Count) (49) | None      | 88              | --                         | 0.0646 (-)<br>(1,6) | --                 | <b>0.0153 (-)</b><br>(1,38) | 0.7871 (+)<br>(1,38)        | <b>&lt;0.0001 (-)</b><br>(1,38) |
| $\dot{V}O_2$ max (2) Mass (95)                                     | None      | 88              | <b>0.0177 (-)</b><br>(1,6) | 0.1705 (-)<br>(1,6) | 0.7121<br>(1,6)    | <b>0.0036 (-)</b><br>(1,77) | 0.5879 (+)<br>(1,77)        | --                              |

|                                                                            |      |    |                            |                            |                 |                             |                      |                                 |
|----------------------------------------------------------------------------|------|----|----------------------------|----------------------------|-----------------|-----------------------------|----------------------|---------------------------------|
| $\dot{V}O_{2,max}$ (2)<br>Mass (with<br>Diaphragm<br>Larvae Count)<br>(49) | None | 88 | --                         | <b>0.0377 (-)</b><br>(1,6) | --              | <b>0.0153 (-)</b><br>(1,38) | 0.6447 (+)<br>(1,38) | <b>&lt;0.0001 (-)</b><br>(1,38) |
| Dissection Mass<br>(95)                                                    | None | 97 | <b>0.0140 (-)</b><br>(1,6) | 0.2126 (-)<br>(1,6)        | 0.4813<br>(1,6) | <b>0.0081 (-)</b><br>(1,77) | 0.3477 (+)<br>(1,77) | --                              |
| Dissection Mass<br>(with<br>Diaphragm<br>Larvae Count)<br>(49)             | None | 97 | --                         | 0.1206 (-)<br>(1,6)        | --              | <b>0.0269 (-)</b><br>(1,38) | 0.6962 (+)<br>(1,38) | <b>&lt;0.0001 (-)</b><br>(1,38) |

Positive signs following *P*-values indicate infected>uninfected, HR>C, mini-muscle>normal or positive effect of age.  
*P*-values < 0.05 are in **bold**.

**Table S2.** Least squares means from SAS Procedure Mixed Analyses of seven body mass measurements, as shown in Table S1.

| Trait                                                         | Least Squares Means $\pm$ Standard Error |                    |                        |                      |                    |                    |
|---------------------------------------------------------------|------------------------------------------|--------------------|------------------------|----------------------|--------------------|--------------------|
|                                                               | Control Uninfected                       | Control Infected   | High Runner Uninfected | High Runner Infected | Normal Muscle      | Mini-muscle        |
| Bleed 1 Mass (at infection)                                   | 31.196 $\pm$ 1.134                       |                    | 28.489 $\pm$ 0.966     |                      | 31.668 $\pm$ 0.698 | 28.017 $\pm$ 1.209 |
| Bleed 2 Mass                                                  | 31.126 $\pm$ 1.282                       | 29.063 $\pm$ 1.266 | 28.404 $\pm$ 1.113     | 27.709 $\pm$ 1.099   | 30.670 $\pm$ 0.720 | 27.481 $\pm$ 1.234 |
| Bleed 3 Mass                                                  | 32.875 $\pm$ 1.390                       | 28.427 $\pm$ 1.353 | 29.678 $\pm$ 1.166     | 27.614 $\pm$ 1.153   | 31.469 $\pm$ 0.755 | 27.828 $\pm$ 1.368 |
| Mass On Wheel                                                 | 34.796 $\pm$ 1.531                       | 31.690 $\pm$ 1.500 | 31.656 $\pm$ 1.318     | 29.549 $\pm$ 1.315   | 34.318 $\pm$ 0.834 | 29.527 $\pm$ 1.449 |
| Mass On Wheel (with diaphragm larvae count)                   | --                                       | 32.027 $\pm$ 1.145 | --                     | 29.919 $\pm$ 0.951   | 32.993 $\pm$ 0.693 | 28.953 $\pm$ 1.277 |
| $\dot{V}O_2$ max (1) (Mass Off)                               | 33.971 $\pm$ 1.507                       | 31.263 $\pm$ 1.479 | 31.093 $\pm$ 1.312     | 29.178 $\pm$ 1.302   | 33.701 $\pm$ 0.873 | 29.052 $\pm$ 1.449 |
| $\dot{V}O_2$ max (1) (Mass Off) (with diaphragm larvae count) | --                                       | 32.153 $\pm$ 0.978 | --                     | 29.613 $\pm$ 0.768   | 32.495 $\pm$ 0.564 | 29.271 $\pm$ 1.184 |
| $\dot{V}O_2$ max (2) (Mass)                                   | 34.688 $\pm$ 1.540                       | 31.864 $\pm$ 1.509 | 31.655 $\pm$ 1.333     | 29.434 $\pm$ 1.322   | 34.069 $\pm$ 0.877 | 29.751 $\pm$ 1.486 |
| $\dot{V}O_2$ max (2) (Mass) (with diaphragm larvae count)     | --                                       | 32.666 $\pm$ 0.930 | --                     | 29.891 $\pm$ 0.715   | 32.895 $\pm$ 0.524 | 29.662 $\pm$ 1.169 |
| Dissection Mass                                               | 34.954 $\pm$ 1.650                       | 31.300 $\pm$ 1.620 | 31.672 $\pm$ 1.443     | 29.332 $\pm$ 1.433   | 33.844 $\pm$ 0.941 | 29.786 $\pm$ 1.560 |
| Dissection Mass (with diaphragm larvae count)                 | --                                       | 31.926 $\pm$ 1.074 | --                     | 29.691 $\pm$ 0.845   | 32.419 $\pm$ 0.620 | 29.208 $\pm$ 1.298 |

**Table S3.** Least squares means and significance levels (2-tailed *P* values; degrees of freedom in parentheses) from SAS Procedure Mixed Analyses of organ masses where diaphragm larvae counts are used as a covariate. Body mass was not transformed for analyses of organ masses.

| Organ Mass (N)                                   | Transform         | Least Squares Means $\pm$ S.E.M. |                      |                      |                      | 2-tailed P values (d.f.) |                          |                              |                          |
|--------------------------------------------------|-------------------|----------------------------------|----------------------|----------------------|----------------------|--------------------------|--------------------------|------------------------------|--------------------------|
|                                                  |                   | Control Infected                 | High Runner Infected | Normal Muscle        | Mini-muscle          | Linetype                 | Mini-muscle              | Body Mass                    | Diaphragm Larvae Count   |
| Spleen (with diaphragm larvae count) (49)        | Log <sub>10</sub> | -1.0206 $\pm$ 0.0368             | -0.9506 $\pm$ 0.0328 | -0.9923 $\pm$ 0.0230 | -0.9789 $\pm$ 0.0398 | 0.1844 (+) (1,6)         | 0.7341 (+) (1,38)        | <b>0.0010 (+)</b> (1,38)     | 0.2962 (-) (1,38)        |
| Wet Liver (with diaphragm larvae count) (49)     | None              | 1.9247 $\pm$ 0.0918              | 1.8994 $\pm$ 0.0785  | 1.7384 $\pm$ 0.0540  | 2.0857 $\pm$ 0.1130  | 0.8270 (+) (1,6)         | <b>0.0064 (+)</b> (1,38) | <b>&lt;0.0001 (+)</b> (1,38) | 0.4228 (-) (1,38)        |
| Dry Liver (with diaphragm larvae count) (49)     | None              | 0.6149 $\pm$ 0.0329              | 0.6101 $\pm$ 0.0282  | 0.5554 $\pm$ 0.0195  | 0.6695 $\pm$ 0.0402  | 0.9081 (+) (1,6)         | <b>0.0110 (+)</b> (1,38) | <b>0.0001 (+)</b> (1,38)     | 0.3524 (-) (1,38)        |
| Wet Ventricle (with diaphragm larvae count) (49) | Log <sub>10</sub> | -0.8618 $\pm$ 0.0110             | -0.8216 $\pm$ 0.0093 | -0.8439 $\pm$ 0.0061 | -0.8395 $\pm$ 0.0150 | <b>0.0205 (+)</b> (1,6)  | 0.7909 (+) (1,38)        | <b>&lt;0.0001 (+)</b> (1,38) | <b>0.0219 (-)</b> (1,38) |
| Dry Ventricle (with diaphragm larvae count) (49) | Log <sub>10</sub> | -1.5007 $\pm$ 0.0100             | -1.4589 $\pm$ 0.0085 | -1.4824 $\pm$ 0.0056 | -1.4773 $\pm$ 0.0134 | <b>0.0119 (+)</b> (1,6)  | 0.7293 (+) (1,38)        | <b>&lt;0.0001 (+)</b> (1,38) | <b>0.0373 (-)</b> (1,38) |

|                                                          |                   |                     |                     |                     |                     |                     |                      |                      |                      |
|----------------------------------------------------------|-------------------|---------------------|---------------------|---------------------|---------------------|---------------------|----------------------|----------------------|----------------------|
| Wet Lungs<br>(with<br>diaphragm<br>larvae count)<br>(48) | Log <sub>10</sub> | -0.6981 ±<br>0.0298 | -0.6462 ±<br>0.0253 | -0.6531 ±<br>0.0174 | -0.6912 ±<br>0.0373 | 0.1974 (+)<br>(1,6) | 0.3468 (+)<br>(1,37) | 0.8286 (+)<br>(1,37) | 0.4936 (+)<br>(1,37) |
| Dry Lungs<br>(with<br>diaphragm<br>larvae count)<br>(48) | Log <sub>10</sub> | -1.3595 ±<br>0.0299 | -1.3093 ±<br>0.0254 | -1.3048 ±<br>0.0175 | -1.3639 ±<br>0.0369 | 0.2121 (+)<br>(1,6) | 0.1429 (+)<br>(1,37) | 0.6851 (+)<br>(1,37) | 0.2972 (+)<br>(1,37) |

Positive signs following *P*-values indicate HR>C, mini-muscle>normal or positive effect of diaphragm larvae count.  
*P*-values < 0.05 are in **bold**.
